# Supplementary material for: Serum Proteomics in Patients with Head and Neck Cancer: Peripheral Blood Immune Response to Treatment
Source: MDPI journal article supplement (doi:10.3390/ijms23116304), 2022-06-04
Supplement: s1 [file s1]

**Table S1.** Proteins analyzed (n = 83) with multiplex immunoassay in patients with head and neck cancer.

|                |           |        |        |
|----------------|-----------|--------|--------|
| IL-1 alfa      | CD4       | ADA    | HO-1   |
| IL-2           | CD5       | ADGRG1 | ICOSLG |
| IL-4           | CD8A      | ANGPT1 | KLRD1  |
| IL-5           | CD27      | ANGPT2 | LAMP3  |
| IL-6           | CD28      | ARG1   | LAP    |
| IL-7           | CD40      | CAIX   | TGF-   |
| IL-8           | CD40-L    | CASP-8 | beta   |
| IL-10          | CD70      | CRTAM  | MIC-   |
| IL-12          | CD83      | DCN    | A/B    |
| IL-12RB1       | CD244     | FASLG  | NCR1   |
| IL-13          |           | Gal-1  | NOS3   |
| IL-18          |           | Gal-9  | PD-L1  |
| IL-21          |           | GZMA   | PD-L2  |
| IL-33          |           | GZMB   | PTN    |
| IL-35          |           |        | TIE2   |
|                |           |        | TRAIL  |
|                |           |        | TWEAK  |
| TNF            | CCL3      | CXCL1  |        |
| TNFRSF4        | CCL4      | CXCL5  |        |
| TNFRSF9        | CCL17     | CXCL9  |        |
| TNFRSF14       | CCL19     | CXCL10 |        |
| TNFRSF21       | CCL20     | CXCL11 |        |
| TNFSF14        | CCL23     | CXCL12 |        |
|                |           | CXCL13 |        |
|                |           | CX3CL1 |        |
| PDGF subunit 8 | IFN-beta  | MMP7   | MCP-1  |
| PDCD1          | IFN-gamma | MMP12  | MCP-2  |
|                |           |        | MCP-3  |
|                |           |        | MCP-4  |
